# Supplementary material for: Pioglitazone and bladder cancer risk: a systematic review and meta‐analysis
Source: PubMed Central journal article supplement (PMC5911601; doi:10.1002/cam4.1354), 2018-02-24

## Supporting Information

**Table S1.** Characteristics of included RCTs.

**Table S2.** Characteristics of included observational studies.

**Table S3.** Quality assessment of observational studies

**Table S4.** Summary results of previous meta-analyses

**Figure S1.** Risk of bias assessments of included RCTs.

**Figure S2.** Sensitivity analysis of the association between pioglitazone use and risk of bladder cancer when omitting each study successively based on adjusted data from observational studies.

**Figure S3.** Sensitivity analysis of the association between pioglitazone use and risk of bladder cancer by including the most recent study only based on adjusted data from observational studies.

**Figure S4.** Funnel plot of the association between pioglitazone use and risk of bladder cancer based adjusted data from observational studies.

**Table S1.** Characteristics of included randomized controlled trials.

| Study                   | NCT number  | Intervention                | No. of patients | Patients                                                                                                                                     | Mean Age (years) | Male (%) | Race (Primary) | Mean HbA1c (%) | Mean BMI (kg/m <sup>2</sup> ) | Duration (years) | Sponsored by Takeda |
|-------------------------|-------------|-----------------------------|-----------------|----------------------------------------------------------------------------------------------------------------------------------------------|------------------|----------|----------------|----------------|-------------------------------|------------------|---------------------|
| Dormandy et al 2005 [4] | NCT00174993 | Pioglitazone versus placebo | 5238            | Type 2 diabetes patients ( 35-75 years) who had evidence of macrovascular disease                                                            | 61.7             | 66.1     | White          | 7.8            | 30.9                          | 2.9              | Yes                 |
| Kernan et al 2016 [2]   | NCT00091949 | Pioglitazone versus placebo | 3876            | Patients (≥40 years) without diabetes who had insulin resistance along with a recent history of ischemic stroke or transient ischemic attack | 63.5             | 65.5     | White          | 5.8            | 30                            | 4.8              | Yes                 |

**Table S2.** Characteristics of included observational studies.

| Study                     | Study design and data source and period                                              | Mean Age (years) | Male (%) | No. of participants                                                    | Selection criteria                                                    | Exposure definition      | Non-exposure definition | Outcome definition              | Follow-up (years) | Controlled covariates                                                                                                                                                                                                                                                                                                         | Sponsored by Takeda |
|---------------------------|--------------------------------------------------------------------------------------|------------------|----------|------------------------------------------------------------------------|-----------------------------------------------------------------------|--------------------------|-------------------------|---------------------------------|-------------------|-------------------------------------------------------------------------------------------------------------------------------------------------------------------------------------------------------------------------------------------------------------------------------------------------------------------------------|---------------------|
| Azoulay L et al 2012 [31] | Nested case-control analysis; UK general practice research database 1988 to 2009; UK | 68.9             | 81.4     | 115,727 T2DM patients                                                  | T2DM patients; newly diagnosed bladder cancer and 20 matched controls | Ever use of pioglitazone | Never use of any TZD    | Bladder cancer (medical record) | 4.8               | Excessive alcohol use, obesity, smoking status, HbA1c, previous bladder conditions, previous cancer, Charlson comorbidity score, and ever use of other antidiabetic agents                                                                                                                                                    | No                  |
| Chang CH et al 2012 [32]  | Nested case-control study; NHIRD; 2000-2007; Taiwan                                  | 71               | 67       | 7,891 T2DM patients diagnosed in 2000 (1,583 cases and 6,308 controls) | T2DM patients ( $\geq 30$ years)                                      | Ever use of pioglitazone | No use of pioglitazone  | Bladder cancer (ICD-9)          | 7.9               | Pioglitazone, rosiglitazone, short-acting human insulin, metformin, sulfonylurea, number of oral antidiabetic agents, chronic liver disease, statins, aspirin, beta-blockers, chronic kidney disease, glinides, nephropathy, cerebrovascular disease, calcium channel blockers, cardiovascular disease, chronic lung disease. | No                  |
| Mamtani R et al 2012 [33] | Retrospective cohort study; THIN database; 2000-2010; UK                             | median 60        | 57       | 28,514 patients (pioglitazone: 10,900; rosiglitazone: 17,614)          | T2DM patients treated with TZD or SU                                  | Pioglitazone             | Rosiglitazone           | Bladder cancer (The Read Codes) | 3.7               | Age, sex, smoking, and hemoglobin HbA1c level                                                                                                                                                                                                                                                                                 | No                  |

|                           |                                                                                      |        |      |                                                                                                    |                                                                                                 |                              |                               |                                      |           |                                                                                                                                                                                                                                                                                                                                                                                                                                                                               |    |
|---------------------------|--------------------------------------------------------------------------------------|--------|------|----------------------------------------------------------------------------------------------------|-------------------------------------------------------------------------------------------------|------------------------------|-------------------------------|--------------------------------------|-----------|-------------------------------------------------------------------------------------------------------------------------------------------------------------------------------------------------------------------------------------------------------------------------------------------------------------------------------------------------------------------------------------------------------------------------------------------------------------------------------|----|
| Neumann A et al. 2012 [6] | Cohort study; French national health insurance information system; 2006-2009; France | 47%>65 | 53   | 1,491,060 patients (pioglitazone: 155,535; No pioglitazone: 1,335,525)                             | T2DM patients aged 40 to 79 years who filled a prescription for a glucose-lowering drug in 2006 | Pioglitazone                 | No exposure to pioglitazone   | Bladder cancer (ICD-10)              | Up to 3.5 | Age, sex, and exposure to glucose-lowering drugs                                                                                                                                                                                                                                                                                                                                                                                                                              | No |
| Song SO et al. 2012 [34]  | Case-control study; Severance Hospital; 2005 to 2011; Korea                          | 69     | 84.2 | 985 patients (bladder cases: 329; bladder controlled: 658)                                         | T2DM patients (≥20 with bladder confirmed by cytology)                                          | Ever use of pioglitazone     | No use of pioglitazone        | Bladder cancer confirmed by cytology | NR        | NR                                                                                                                                                                                                                                                                                                                                                                                                                                                                            | No |
| Tseng CH et al. 2012 [35] | Cohort study; NHIRD; 2006 to 2009; Taiwan                                            | NR     | NR   | 54,928 patients from the randomly selected individuals (pioglitazone 2,545; No pioglitazone 52383) | T2DM patients under therapy with oral antidiabetic agents or insulin                            | Ever prescribed pioglitazone | Never prescribed pioglitazone | bladder cancer (ICD-9)               | Up to 4   | Age, sex, diabetes duration, nephropathy, urinary tract disease, hypertension, chronic obstructive pulmonary disease, cerebrovascular disease, ischemic heart disease, peripheral arterial disease, eye disease, dyslipidemia, heart failure, rosiglitazone, sulfonylurea, meglitinide, metformin, acarbose, insulin, statin, fibrate, ACE inhibitor/angiotensin receptor blocker, calcium channel blocker, region of residence, occupation, and other cancer before baseline | No |

|                              |                                                                                     |    |    |                                                          |                                                                                                |                          |                            |                                            |                                   |                                                                                                                                                                 |     |
|------------------------------|-------------------------------------------------------------------------------------|----|----|----------------------------------------------------------|------------------------------------------------------------------------------------------------|--------------------------|----------------------------|--------------------------------------------|-----------------------------------|-----------------------------------------------------------------------------------------------------------------------------------------------------------------|-----|
| Hsiao FY et al 2013 [36]     | Nested case control study; NHIRD; 1997-2008; Taiwan                                 | 66 | 68 | 20,472 patients (bladder cases: 3,412; controls: 17,060) | T2DM patients with new diagnosed bladder cancer and 5 matched controls                         | Exposed to pioglitazone  | No exposed to pioglitazone | bladder cancer (ICD-9)                     | 3.6                               | Duration of diabetes, co-morbid conditions, and concomitant medications                                                                                         | No  |
| Origasa H et al. 2013 [37]   | Nested case-control study; Tbyama University Hospital Database; 2005 to 2011; Japan | 69 | 74 | 95 matched patients (40 cases and 55 controls)           | T2DM patients with pathologically diagnosed bladder cancer, and selectively matched controlled | Ever use of pioglitazone | Never use of pioglitazone  | bladder cancer (pathologically diagnosed ) | NR                                | Age, HbA1c, and other antidiabetic medications                                                                                                                  | No  |
| Vallarino C et al. 2013 [38] | Retrospective cohort study; i3 InVision Data Mart™ database; 2000 to 2010; US       | 59 | 57 | 56,536 (pioglitazone : 38,588; insulin: 17,948)          | T2DM patients (≥45 years) who were new users of either pioglitazone or insulin                 | Pioglitazone             | Insulin                    | bladder cancer (ICD-9)                     | Pioglitazone: 1.9<br>Insulin: 1.9 | Age, gender, drug initiation, medical conditions, and drug use                                                                                                  | Yes |
| Wei L et al. 2013 [39]       | Cohort study; GPRD; 2001 to 2010; UK                                                | 62 | 57 | 34,498 patients (17,249 in each group)                   | T2DM patients (≥40 years) entered the study at the date of first                               | Pioglitazone             | No use of pioglitazone     | bladder cancer (medical record)            | Pioglitazone: 3.5; Control: 5.3   | Age, gender, duration of diabetes, smoking status and body mass index (BMI), insulin treatment and number and type of different oral hypoglycaemic drug classes | No  |

|                        |                                                                                                                 |                |    |                                                                           |                                                                                                   |                          |                           |                        |     |                                                                                                                                                                                                                                                              |     |
|------------------------|-----------------------------------------------------------------------------------------------------------------|----------------|----|---------------------------------------------------------------------------|---------------------------------------------------------------------------------------------------|--------------------------|---------------------------|------------------------|-----|--------------------------------------------------------------------------------------------------------------------------------------------------------------------------------------------------------------------------------------------------------------|-----|
|                        |                                                                                                                 |                |    |                                                                           | prescription for pioglitazone or other oral hypoglycemic drugs during the study period            |                          |                           |                        |     |                                                                                                                                                                                                                                                              |     |
| Jin SM et al 2014[40]  | Retrospective cohort study (nest Case-control) ; four tertiary referral hospitals in Korea; 2005 to 2011; Korea | 63             | 53 | 113,193 patients (pioglitazone:11,240; controls:101,953)                  | T2DM patients with two or more clinic visits                                                      | Ever use of pioglitazone | never use of pioglitazone | bladder cancer         | 4.5 | Age and sex                                                                                                                                                                                                                                                  | Yes |
| Kuo HW et al 2014 [41] | Nested case control study; NHIRD; 2002 - 2009; Taiwan                                                           | 70             | 62 | 1295 patients randomly selected (bladder cases 259; controls 1036)        | T2DM patients with new diagnoses of bladder cancer and 4 randomly selected controls for each case | Pioglitazone             | No use of pioglitazone    | bladder cancer (ICD-9) | NR  | Nephropathy, urinary tract diseases, urinary tract infection, urinary tract stone, hypertension, chronic obstructive pulmonary disease, stroke, ischemic heart disease, peripheral arterial diseases, eye disease, and dyslipidemia.                         | No  |
| Lee MY et al 2014 [42] | Cohort study; NHI Research Database;2005-2009; Taiwan                                                           | >60 years: 66% | 47 | 34,970 diabetes patients with the entry date of 2003 (pioglitazone:3,497; | T2DM                                                                                              | Ever use of pioglitazone | Never use of pioglitazone | Bladder cancer (ICD-9) | 4   | Sex, age, duration of diabetes, other diabetes medications, income, residential area, nephritis, chronic kidney disease, kidney infections, hydronephrosis, calculus of the lower urinary tract, cystitis, other disorders of the urethra and urinary tract, | No  |

|                         |                                                                                                                                                                                                            |                |    |                                                                                                                      |                           |                               |                             |                                   |            |                                                                                                                                                                                                                                                                                                                                                                                               |     |
|-------------------------|------------------------------------------------------------------------------------------------------------------------------------------------------------------------------------------------------------|----------------|----|----------------------------------------------------------------------------------------------------------------------|---------------------------|-------------------------------|-----------------------------|-----------------------------------|------------|-----------------------------------------------------------------------------------------------------------------------------------------------------------------------------------------------------------------------------------------------------------------------------------------------------------------------------------------------------------------------------------------------|-----|
|                         |                                                                                                                                                                                                            |                |    | never users of pioglitazone:31,473)                                                                                  |                           |                               |                             |                                   |            | hypertension and hyperlipidemia                                                                                                                                                                                                                                                                                                                                                               |     |
| Levin D et al 2014 [43] | Cohort study; British Columbia (2000-2004), Finland (2001-2008), Manchester (2001-2007), Rotterdam (2001 - 2004), Scotland (2001 - 2006) and the UK Clinical Practice Research Datalink (2003-2009; Europe | 63             | 53 | Scotland: 252,269; CPRD: 156,443; Finland: 426,767; British Columbia: 153.862; Rotterdam : 6,694; Manchester: 11,561 | T2DM                      | Ever exposure to pioglitazone | No exposure to pioglitazone | Bladder cancer (ICD-10)           | 4.0 to 7.4 | Age, calendar year, and ever exposure to pioglitazone                                                                                                                                                                                                                                                                                                                                         | No  |
| Lewis JD et al 2015 [8] | Cohort and nested case-control study; KPNC; 1997-2002 until December 2012; US                                                                                                                              | >60 years: 49% | 54 | 193,099 patients (pioglitazone:34,181; Never user:158,918)                                                           | T2DM patients (≥40 years) | Ever use of pioglitazone      | Never use of pioglitazone   | Bladder cancer (pathology report) | 10         | Age, sex, and year of cohort entry, smoking, race/ethnicity, other diabetes medications, other bladder conditions, hemoglobin A1c concentration and the interaction with new diagnosis of diabetes, and duration of diabetes, the 3-level time-updated proteinuria testing, variable median household income, congestive heart failure, cancer other than bladder cancer, renal insufficiency | Yes |

|                           |                                                                                                                                    |                |      |                                                                                   |                                                                         |                              |                               |                                   |     |                                                                                                                                                                                                                                                                                                                                                                                               |     |
|---------------------------|------------------------------------------------------------------------------------------------------------------------------------|----------------|------|-----------------------------------------------------------------------------------|-------------------------------------------------------------------------|------------------------------|-------------------------------|-----------------------------------|-----|-----------------------------------------------------------------------------------------------------------------------------------------------------------------------------------------------------------------------------------------------------------------------------------------------------------------------------------------------------------------------------------------------|-----|
| Lewis JD et al 2011 [5]   | Cohort and nested case-control study; KPNC; 1997-2002 until April 2008; US                                                         | >60 years: 49% | 54   | 193,099 patients (pioglitazone:30,173; Never user:162,926)                        | T2DM patients (≥40 years)                                               | Ever use of pioglitazone     | Never use of pioglitazone     | Bladder cancer (pathology report) | 10  | Age, sex, and year of cohort entry, smoking, race/ethnicity, other diabetes medications, other bladder conditions, hemoglobin A1c concentration and the interaction with new diagnosis of diabetes, and duration of diabetes, the 3-level time-updated proteinuria testing, variable median household income, congestive heart failure, cancer other than bladder cancer, renal insufficiency | Yes |
| Erdmann E et al 2016 [10] | PROactive; randomized open label trial; Europe                                                                                     | 63             | 65   | 3599 patients                                                                     | T2DM patients completed the final visit of PROactive                    | Pioglitazone                 | Placebo                       | Bladder cancer                    | 7.8 | NR                                                                                                                                                                                                                                                                                                                                                                                            | Yes |
| Han E et al 2016 [44]     | Nested case control study; Korean NHI Service National Sample Cohort; 2002 to 2013; Korea                                          | >60 years: 83% | 81.2 | 935 patients (bladder cancers: 85; controls:850)                                  | T2DM patients with new diagnosed bladder cancer and 10 matched controls | Ever use of pioglitazone     | Never use of TZD              | Bladder cancer (ICD-10)           | NR  | Antidiabetic medication, aspirin, statin use, past history of any cancer, renal disease, urolithiasis, other ureter or bladder diseases, congestive heart failure, alcoholic liver disease, Charlson comorbidity score, household income level, and residential area                                                                                                                          | No  |
| Korhonen P et al 2016 [9] | Retrospective cohort study; Healthcare databases from Finland (1988-2011), the Netherlands(1995-2011), Sweden (2005-2011), and the | 64             | 55   | 373,446 patients (pioglitazone: 56,337; other diabetes drug treatments : 317,109) | T2DM patients (≥40 years) who initiated diabetic treatment              | Ever exposed to pioglitazone | Never exposed to pioglitazone | Bladder cancer (ICD-10)           | 2.9 | Age, sex, diabetic drug treatments, exact matching variables, groups based on quintiles of propensity scores, all variables used in the propensity score, plus possible confounding variables                                                                                                                                                                                                 | Yes |



|                                                                                                                                                                                                                                                                                                                                                                                  |                                                                                                                                                        |      |    |                                                                |                                                                                                    |              |                        |                                           |     |                                                                                                                                                                                                                                |    |
|----------------------------------------------------------------------------------------------------------------------------------------------------------------------------------------------------------------------------------------------------------------------------------------------------------------------------------------------------------------------------------|--------------------------------------------------------------------------------------------------------------------------------------------------------|------|----|----------------------------------------------------------------|----------------------------------------------------------------------------------------------------|--------------|------------------------|-------------------------------------------|-----|--------------------------------------------------------------------------------------------------------------------------------------------------------------------------------------------------------------------------------|----|
|                                                                                                                                                                                                                                                                                                                                                                                  | UK (1987-2011); Europe                                                                                                                                 |      |    |                                                                |                                                                                                    |              |                        |                                           |     |                                                                                                                                                                                                                                |    |
| Mackenzie TA et al 2016 [45]                                                                                                                                                                                                                                                                                                                                                     | Retrospective cohort study; Medicare fee-for-service plan using inpatient, outpatient (2003–2011) and prescription (2006–2011) administrative data; US | 75.1 | 38 | Prevalent cohort: 1,161,443; Pioglitazone 38,091               | T2DM received diabetes medications                                                                 | Pioglitazone | No use of pioglitazone | Bladder cancer (ICD-9)                    | 3.5 | Age, gender, race; low-income subsidy for Medicare Part D, alcohol abuse, chronic obstructive lung disease and/or tobacco use, obesity, diabetes complications, and Charlson comorbidities                                     | No |
| Tuccori M et al. 2016 [11]                                                                                                                                                                                                                                                                                                                                                       | Cohort study; UK CPRD; 2000 to 2013; UK                                                                                                                | 64   | 59 | 145,806 (pioglitazone 921; rosiglitazone 2127; No use 142,758) | T2DM patients (≥40 years) have at least one year of CPRD medical history before first prescription | Pioglitazone | No use of TZD          | Bladder cancer (read code classification) | 4.7 | Age, year of cohort entry, sex, alcohol-related disorders, smoking status, obesity, haemoglobin A1c, previous cancer, bladder conditions, Charlson comorbidity score, duration of treated diabetes, and urine protein testing. | No |
| T2DM, type 2 diabetes; NIH, National Institutes of Health; CPRD, Clinical Practice Research Datalink; KPNC, Kaiser Permanente Northern California; NHIRD, National Health Insurance Research Database; GPRD, General Practice Research Database; THIN, The Health Improvement Network; TZD, thiazolidinedione; SU, sulfonylureas; ICD, International Classification of Diseases. |                                                                                                                                                        |      |    |                                                                |                                                                                                    |              |                        |                                           |     |                                                                                                                                                                                                                                |    |

**Table S3.** Quality assessment of observational studies

| <b>Study</b>                 | <b>Selection</b> | <b>Comparability</b> | <b>Exposure/Outcome</b> | <b>Total</b> |
|------------------------------|------------------|----------------------|-------------------------|--------------|
| Azoulay L et al 2012 [31]    | ****             | **                   | ***                     | 9            |
| Chang CH et al 2012 [32]     | ****             | *                    | ***                     | 8            |
| Mamtani R et al 2012 [33]    | ****             | **                   | ***                     | 9            |
| Neumann A et al. 2012 [16]   | ****             | *                    | ***                     | 8            |
| Song SO et al. 2012 [34]     | ****             |                      | ***                     | 7            |
| Tseng CH et al. 2012 [35]    | ***              | *                    | ***                     | 7            |
| Hsiao FY et al 2013 [36]     | ****             | *                    | ***                     | 8            |
| Origasa H et al. 2013 [37]   | ***              | *                    | **                      | 6            |
| Vallarino C et al. 2013 [38] | ****             | *                    | ***                     | 8            |
| Wei L et al. 2013 [39]       | ***              | **                   | ***                     | 8            |
| Jin SM et al 2014 [40]       | ****             | *                    | ***                     | 8            |
| Kuo HW et al 2014 [41]       | ****             | *                    | ***                     | 8            |
| Lee MY et al 2014 [42]       | ***              | *                    | ***                     | 7            |
| Levin D et al 2014 [43]      | ****             | *                    | ***                     | 8            |
| Lewis JD et al 2015 [8]      | ****             | **                   | ***                     | 9            |
| Erdmann E et al 2016 [10]    | -                | -                    | -                       | -            |
| Han E et al 2016 [44]        | ****             | *                    | ***                     | 8            |
| Korhonen P et al 2016 [9]    | ****             | *                    | ***                     | 8            |
| Mackenzie TA et al 2016 [45] | **               | **                   | ***                     | 7            |
| Tuccori M et al. 2016 [11]   | ****             | **                   | ***                     | 9            |

**Table 4.** Summary results of previous meta-analyses

| Study                                                                                                                                                                     | Search time   | Interventions                                     | Design of study included (n/N)                       | Analysis model/ subgroup analysis                                             | Bladder cancer and relevant results                                                                                   |
|---------------------------------------------------------------------------------------------------------------------------------------------------------------------------|---------------|---------------------------------------------------|------------------------------------------------------|-------------------------------------------------------------------------------|-----------------------------------------------------------------------------------------------------------------------|
| Zhu Z et al, 2012 [13]                                                                                                                                                    | January, 2012 | Pioglitazone                                      | RCTs and observational studies (5/2,350,908)         | Fixed-effects model;<br>Subgroup: cumulative dose or duration                 | RR 1.17; 95% CI (1.03-1.32);<br>Duration response relationship                                                        |
| Turner RM et al 2014 [14]                                                                                                                                                 | July, 2013    | Thiazolidinedione (pioglitazone or rosiglitazone) | RCTs (3/7878)<br>Observational studies (8/1,982,536) | Fixed-effects model;<br>Subgroup: cumulative dose or duration                 | RCT: OR 2.51; 95% CI (1.09-5.80);<br>Observational studies: OR 1.21; 95%CI (1.09-1.35);<br>Dose response relationship |
| Monami M et al, 2014 [15]                                                                                                                                                 | August, 2011  | Thiazolidinedione (pioglitazone or rosiglitazone) | RCTs (3/6272)                                        | Fixed-effects model;<br>NR                                                    | OR 2.05;95% CI (0.84-5.02)                                                                                            |
| He SY et al. 2014 [16]                                                                                                                                                    | July, 2012    | Pioglitazone                                      | Observational studies and RCTs (9/2,596,856)         | Fixed-effects model;<br>Subgroup: design, gender, cumulative dose or duration | HR 1.48 95%CI (1.09-2.00);<br>Dose-response relationship                                                              |
| Ferwana M et al. 2013 [17]                                                                                                                                                | October, 2012 | Pioglitazone                                      | Observational studies and RCTs (6/215,142)           | Random-effects model;<br>Subgroup: cumulative dose or duration                | HR 1.23; 95%CI (1.09-1.39);<br>Duration response relationship                                                         |
| Colmers IN et al 2012 [18]                                                                                                                                                | March, 2012   | Thiazolidinedione (pioglitazone or rosiglitazone) | RCT(1/5238)<br>Observational study (3/1,739,087)     | Random-effects model;<br>NR                                                   | RCT: RR 2.36;95%CI (0.91-6.13);<br>Observational studies: RR 1.22; 95% CI (1.07-1.39)                                 |
| n/N: number of studies/number of patients; RCTs: randomized controlled trials; RR, risk ratio; OR, odds ratio; HR, hazard risk; CI, confidence interval; NA: not reported |               |                                                   |                                                      |                                                                               |                                                                                                                       |

**Figure S1.** Risk of bias assessments of included randomized controlled trials

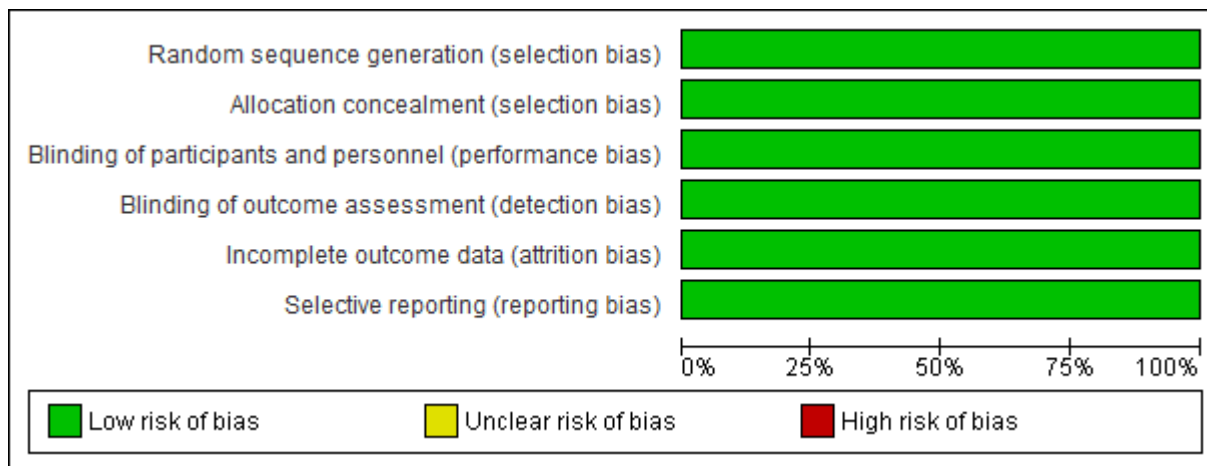



**Figure S3.** Sensitivity analysis of the association between pioglitazone use and risk of bladder cancer by including the most recent studies based on adjusted data from observational studies. For the studies with possible overlapping patients (Azoulay L et al 2012 and Wei L et al 2013 based on UK General Practice Research Database; Chang CH et al 2012, Kuo HW et al 2014, Lee MY et al 2014, Tseng CH et al 2012, and Hsiao FY et al 2013 based on Taiwan National Health Insurance databases), additional sensitivity analysis was performed by including the most recent study only (Wei L et al 2013 and Lee MY et al 2014)

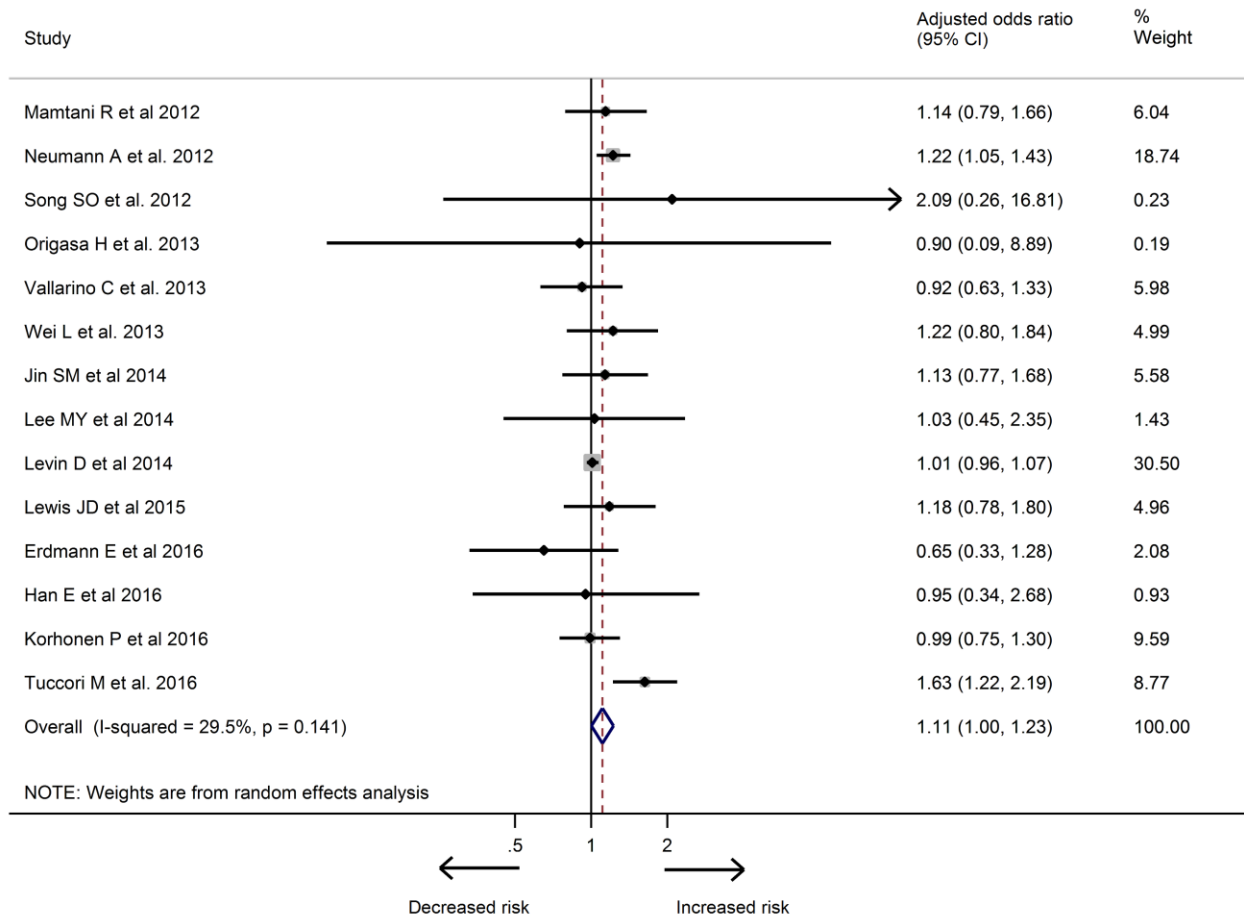

**Figure S4.** Funnel plot of the association between pioglitazone use and risk of bladder cancer based on adjusted data from observational studies.

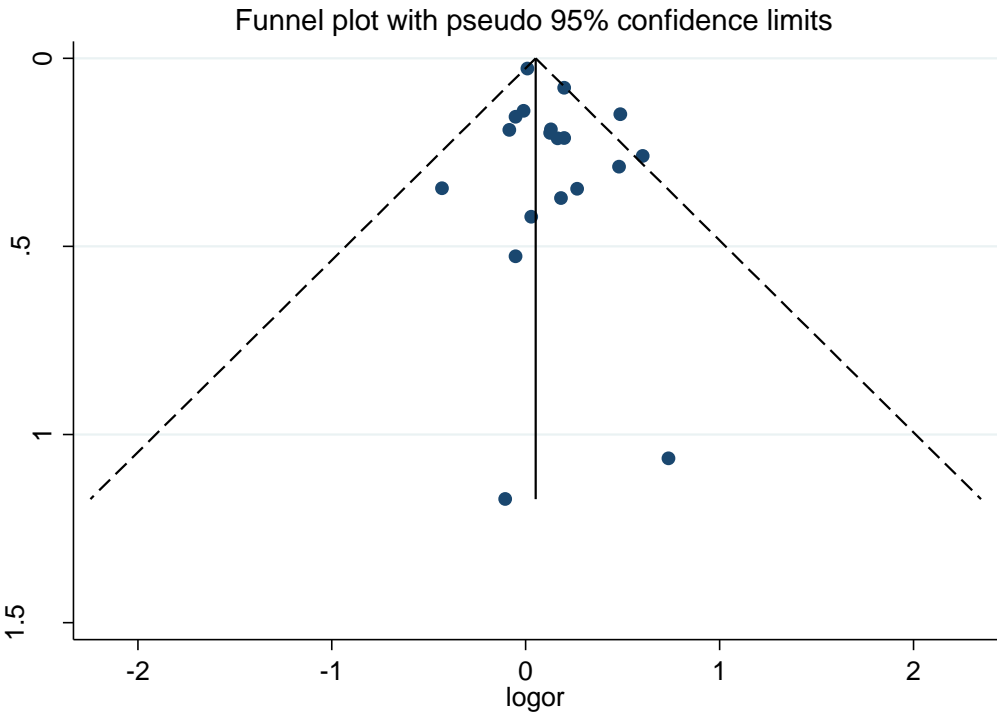

Supplement: CAM4-7-1070-s001.pdf [file CAM4-7-1070-s001.pdf]
